# Supplementary material for: Factors Associated with Body Image and Self-Esteem in Mastectomized Breast Cancer Survivors
Source: MDPI journal article supplement (doi:10.3390/ijerph20065154), 2023-03-15
Supplement: s1 [file s1]

**PROGRAMA DE ENTRENAMIENTO MUSCULAR PERSONALIZADO  
ORIENTADO A LA FUERZA EN MUJERES SUPERVIVIENTES AL CÁNCER  
DE MAMA**

**ESCALA DE AUTOESTIMA DE ROSEMBERG**

**Este Test tiene como objetivo evaluar el sentimiento de satisfacción que la persona tiene consigo misma. Por favor, conteste las siguientes frases con la respuesta que considere más adecuada.**

A Muy de acuerdo, B de acuerdo, C en desacuerdo, D muy en desacuerdo

|                                                                                | A | B | C | D |
|--------------------------------------------------------------------------------|---|---|---|---|
| Siento que soy una persona de aprecio, al menos, en igual medida que los demás |   |   |   |   |
| Estoy convencido de que tengo cualidades buenas                                |   |   |   |   |
| Soy capaz de hacer las cosas tan bien como la mayoría de la gente              |   |   |   |   |
| Tengo una actitud positiva de mi misma                                         |   |   |   |   |
| En general, estoy satisfecho de mi misma                                       |   |   |   |   |
| Siento que no tengo mucho de que estar orgullosa                               |   |   |   |   |
| En general, me inclino a pensar que soy una fracasada                          |   |   |   |   |
| Me gustaría poder sentir más respeto por mi mismo                              |   |   |   |   |
| Hay veces que realmente pienso que soy una inútil                              |   |   |   |   |
| A veces creo que no soy buena persona                                          |   |   |   |   |

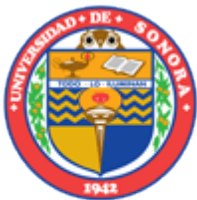

"El saber de mis hijos  
hará mi grandeza"

## PROGRAMA DE ENTRENAMIENTO MUSCULAR PERSONALIZADO ORIENTADO A LA FUERZA EN MUJERES SUPERVIVIENTES AL CÁNCER DE MAMA

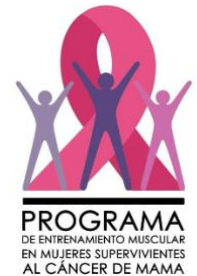

### ESCALA DE IMAGEN CORPORAL (HOPWOOD)

|                                                                                    | Nada | Un Poco | Bastante | Mucho |
|------------------------------------------------------------------------------------|------|---------|----------|-------|
| ¿Se ha sentido avergonzada por su apariencia?                                      |      |         |          |       |
| ¿Se siente menos atractiva físicamente a causa de su enfermedad o su tratamiento?  |      |         |          |       |
| ¿Se ha sentido insatisfecha con su apariencia estando vestida?                     |      |         |          |       |
| ¿Se ha sentido menos femenina como consecuencia de su enfermedad o tratamiento?    |      |         |          |       |
| ¿Le resulta difícil mirarse estando desnuda?                                       |      |         |          |       |
| ¿Se ha sentido menos atractiva sexualmente a causa de su enfermedad o tratamiento? |      |         |          |       |
| ¿Evita usted a las personas debido a como se siente a causa de su apariencia?      |      |         |          |       |
| ¿Ha sentido que el tratamiento ha dejado su cuerpo incompleto?                     |      |         |          |       |
| ¿Se ha sentido insatisfecha con su cuerpo?                                         |      |         |          |       |
| ¿Se ha sentido insatisfecha con la apariencia de su cicatriz?                      |      |         |          |       |
